# Supplementary material
Source: PubMed Central journal article supplement (PMC7092738)
Supplement: Supplemental_Material.pdf [file Supplemental_Material.pdf]

## Supplement Material

### eAppendix. Definition of GI malignancy and GI bleeding

---

|                                    | International Classification of Disease 9th revision (ICD-9) primary diagnosis code                                                                                                                                                  |
|------------------------------------|--------------------------------------------------------------------------------------------------------------------------------------------------------------------------------------------------------------------------------------|
| Variable                           |                                                                                                                                                                                                                                      |
| GI malignancy                      |                                                                                                                                                                                                                                      |
| Esophagus                          | 150.x                                                                                                                                                                                                                                |
| Stomach                            | 151.x                                                                                                                                                                                                                                |
| Small intestine including duodenum | 152.x                                                                                                                                                                                                                                |
| Colon                              | 153.x                                                                                                                                                                                                                                |
| Rectum                             | 154.x                                                                                                                                                                                                                                |
| GI bleeding*                       | 578.x, 537.83, 569.3, 569.85, 562.02, 562.03, 562.12, 562.13, 535.01, 535.11, 535.21, 535.31, 535.41, 535.51, 535.61, 531.0, 531.2, 531.4, 531.6, 532.0, 532.2, 532.4, 532.6, 533.0, 533.2, 533.4, 533.6, 534.0, 534.2, 534.4, 534.6 |

---

Abbreviations: GI = gastrointestinal

Primary diagnosis code was used.

**eTable 1. Baseline characteristics in AIS patients with GI malignancy or recent GI bleeding treated with rtPA vs. otherwise eligible patients but not treated with rtPA**

| Characteristics                            | Patients treated with<br>rtPA<br>(N=136) | Patients not treated<br>with rtPA<br>(N=148) | Absolute<br>standardized<br>difference (%) |
|--------------------------------------------|------------------------------------------|----------------------------------------------|--------------------------------------------|
| Age, median (IQR), y                       | 80 (76 - 86)                             | 84 (79 - 89)                                 | 34.5                                       |
| Women, No. (%)                             | 72 (52.9)                                | 97 (65.5)                                    | 25.9                                       |
| Race, No. (%)                              |                                          |                                              | 31.0                                       |
| Non-Hispanic white                         | 120 (88.2)                               | 122 (82.4)                                   |                                            |
| Non-Hispanic black                         | 8 (5.9)                                  | 12 (8.1)                                     |                                            |
| Hispanic                                   | 3 (2.2)                                  | 7 (4.7)                                      |                                            |
| Asian                                      | 4 (2.9)                                  | 3 (2.0)                                      |                                            |
| Other                                      | 1 (0.7)                                  | 4 (2.7)                                      |                                            |
| Medical History, No. (%)                   |                                          |                                              |                                            |
| AF or atrial flutter                       | 69 (51.5)                                | 96 (64.9)                                    | 27.4                                       |
| Previous stroke                            | 26 (19.4)                                | 43 (29.1)                                    | 22.7                                       |
| Previous transient ischemic attack         | 14 (10.5)                                | 15 (10.1)                                    | 1.0                                        |
| Carotid Stenosis                           | 8 (6.0)                                  | 8 (5.4)                                      | 2.4                                        |
| CAD including prior myocardial infarction  | 45 (33.6)                                | 63 (42.6)                                    | 18.6                                       |
| Diabetes mellitus                          | 41 (30.6)                                | 46 (31.1)                                    | 1.1                                        |
| Peripheral vascular disease                | 7 (5.2)                                  | 14 (9.5)                                     | 16.3                                       |
| Hypertension                               | 105 (78.4)                               | 122 (82.4)                                   | 10.3                                       |
| Smoker                                     | 9 (6.7)                                  | 11 (7.4)                                     | 2.8                                        |
| Dyslipidemia                               | 69 (51.5)                                | 60 (40.5)                                    | 22.1                                       |
| Heart failure                              | 20 (14.9)                                | 31 (21.0)                                    | 15.7                                       |
| Laboratory data                            |                                          |                                              |                                            |
| Creatinine, median (IQR), mg/dL            | 1.0 (0.9-1.4)                            | 1.0 (0.8-1.3)                                | 1.5                                        |
| Arrival and admission information, No. (%) |                                          |                                              |                                            |

|                                       |                    |                    |      |
|---------------------------------------|--------------------|--------------------|------|
| Onset to door time, median (IQR), min | 55.0 (35.0 - 89.0) | 65.5 (41.5 - 94.0) |      |
| EMS arrival                           | 109 (89.3)         | 121 (88.3)         | 3.3  |
| Arrived off-hours                     | 72 (52.9)          | 68 (46.0)          | 14.0 |
| NIHSS at presentation, median (IQR)   | 14 (8-19)          | 10 (4-18)          | 33.9 |
| Preadmission medication, No. (%)      |                    |                    |      |
| Antiplatelet                          | 46 (37.4)          | 42 (30.2)          | 15.2 |
| Anticoagulant                         | 16 (13.1)          | 25 (17.9)          | 13.1 |
| Antihypertensive                      | 94 (82.5)          | 114 (88.4)         | 16.8 |
| Cholesterol reducer                   | 58 (43.9)          | 71 (48.0)          | 8.1  |
| Diabetic medications                  | 22 (19.6)          | 29 (22.7)          | 7.4  |
| Vital signs                           |                    |                    |      |
| Heart rate, median (IQR), bpm         | 79 (69 - 92)       | 79 (66 - 90)       | 6.0  |
| sBP, median (IQR), mmHg               | 154 (136 - 171)    | 144 (130 - 161)    | 23.4 |
| dBP, median (IQR), mmHg               | 79 (67 - 89)       | 75 (64 - 86)       | 14.5 |
| Hospital Characteristics              |                    |                    |      |
| Bed size, median (IQR), No.           | 361 (260 - 538)    | 340 (236 - 542)    | 7.2  |
| Academic center, No. (%)              | 105 (79.0)         | 111 (76.0)         | 7.0  |
| Primary Stroke Center, No. (%)        | 29 (21.3)          | 33 (22.3)          | 2.4  |
| Rural hospital, No. (%)               | 5 (3.7)            | 3 (2.0)            | 9.9  |
| Annual IV rtPA cases, median (IQR)    | 23.0 (16.6 - 38.2) | 21.4 (13.8 - 33.0) | 13.6 |

---

Abbreviations: GI, gastrointestinal; IQR, interquartile range; EMS, emergency medical services; sBP, systolic blood pressure; dBP, diastolic blood pressure; rtPA, recombinant tissue plasminogen activator
